# Supplementary material for: Na0.5Bi0.5TiO3 perovskite anode for lithium-ion batteries
Source: Royal Society of Chemistry journal article supplement (doi:10.1039/d4se00935e), 2024-01-01
Supplement: d4se00935e1.pdf [file d4se00935e1.pdf]

## Supporting Information

for

### **Na<sub>0.5</sub>Bi<sub>0.5</sub>TiO<sub>3</sub> Perovskite Anode for Lithium Ion Battery**

Sridivya Chintha<sup>1</sup>, Shahan Atif<sup>1</sup>, Anshuman Chaupatnaik<sup>1</sup>, Alexander Golubnichiy<sup>2</sup>, Artem M. Abakumov<sup>2</sup>, and Prabeer Barpanda<sup>1,3,4\*</sup>

<sup>1</sup> Faraday Materials Laboratory (FaMaL), Materials Research Center, Indian Institute of Science, Bangalore 560012, India

<sup>2</sup> Center for Energy Science and Technology, Skolkovo Institute of Science and Technology, Bolshoi blv. 30-1, 121205 Moscow, Russia

<sup>3</sup> Helmholtz Institute Ulm (HIU), Electrochemical Energy Storage, Ulm 89081, Germany

<sup>4</sup> Institute of Nanotechnology, Karlsruhe Institute of Technology (KIT), Karlsruhe 76021, Germany

\* Corresponding author. E-mail address: [prabeer@iisc.ac.in](mailto:prabeer@iisc.ac.in)

**Table S1.** Crystallographic parameters derived from the Rietveld refinement of lab XRD data (Cu K $\alpha$ ) of Na<sub>0.5</sub>Bi<sub>0.5</sub>TiO<sub>3</sub> at 25 °C.

| Formula                                  | Na <sub>0.5</sub> Bi <sub>0.5</sub> TiO <sub>3</sub>    |            |            |        |           |                             |
|------------------------------------------|---------------------------------------------------------|------------|------------|--------|-----------|-----------------------------|
| Crystal system                           | <i>Trigonal</i>                                         |            |            |        |           |                             |
| Space group                              | <i>R3c</i> (#161)                                       |            |            |        |           |                             |
| Unit cell parameter (Å)                  | $a = b = 5.4844, c = 13.50305$                          |            |            |        |           |                             |
| Unit cell volume (Å <sup>3</sup> )       | $V = 351.744$                                           |            |            |        |           |                             |
| Theoretical density (g/cm <sup>3</sup> ) | 6.001                                                   |            |            |        |           |                             |
| Refinement factors                       | $R_{\text{Bragg}} = 2.34\%, \text{Global } \chi^2 = 24$ |            |            |        |           |                             |
| Atom                                     | Wyckoff Position                                        | $x/a$      | $y/b$      | $z/c$  | Occupancy | $B_{\text{iso}}/\text{Å}^2$ |
| Na                                       | 6a                                                      | 0          | 0          | 0.3    | 0.5       | 1.73(63)                    |
| Bi                                       | 6a                                                      | 0          | 0          | 0.3    | 0.5       | 1.73(63)                    |
| Ti                                       | 6a                                                      | 0          | 0          | 0      | 1         | -0.47(12)                   |
| O                                        | 18b                                                     | 0.1286(63) | 0.2921(60) | 0.1124 | 1         | 1                           |

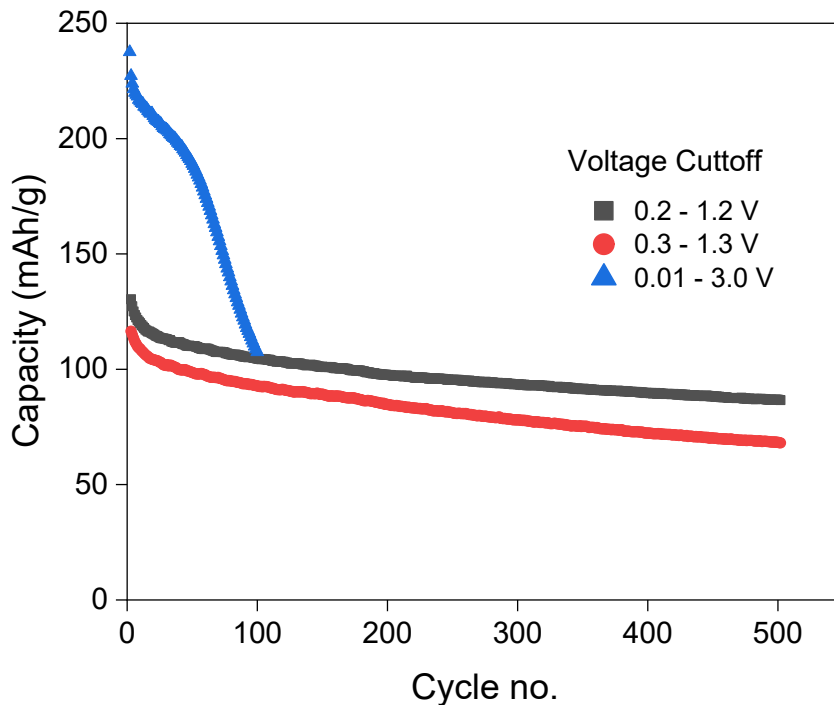

**Figure S1.** Cycling performance of NBT perovskite anode in different voltage windows: (0.01-3.0 V) -red, (0.2-1.2 V) - green, and (0.3-1.3 V) – blue.

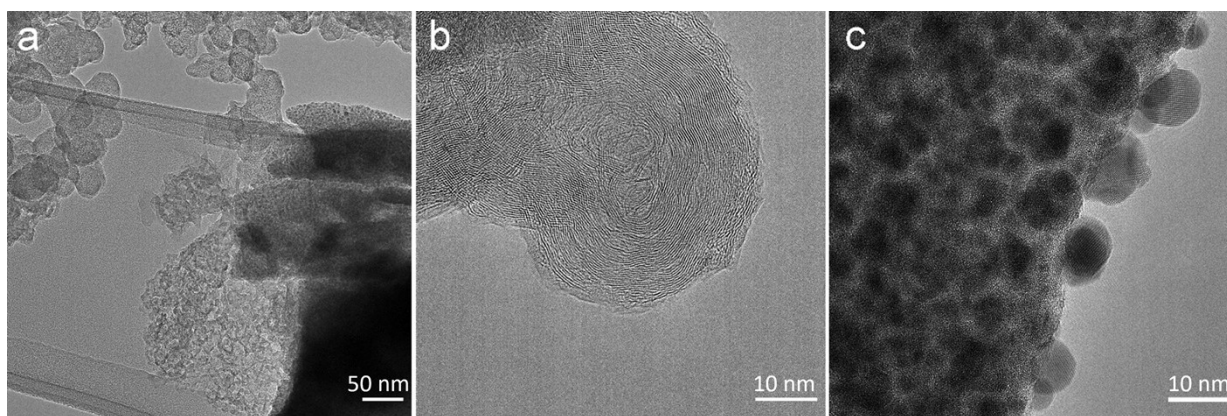

**Figure S2.** TEM images of the 1C sample: (a) mixture of conductive carbon, parent  $\text{Na}_{0.5}\text{Bi}_{0.5}\text{TiO}_3$  and  $\text{Li}_2\text{O}$ , (b) magnified image of conductive carbon, and (c) magnified image of the surface of pristine  $\text{Na}_{0.5}\text{Bi}_{0.5}\text{TiO}_3$ .

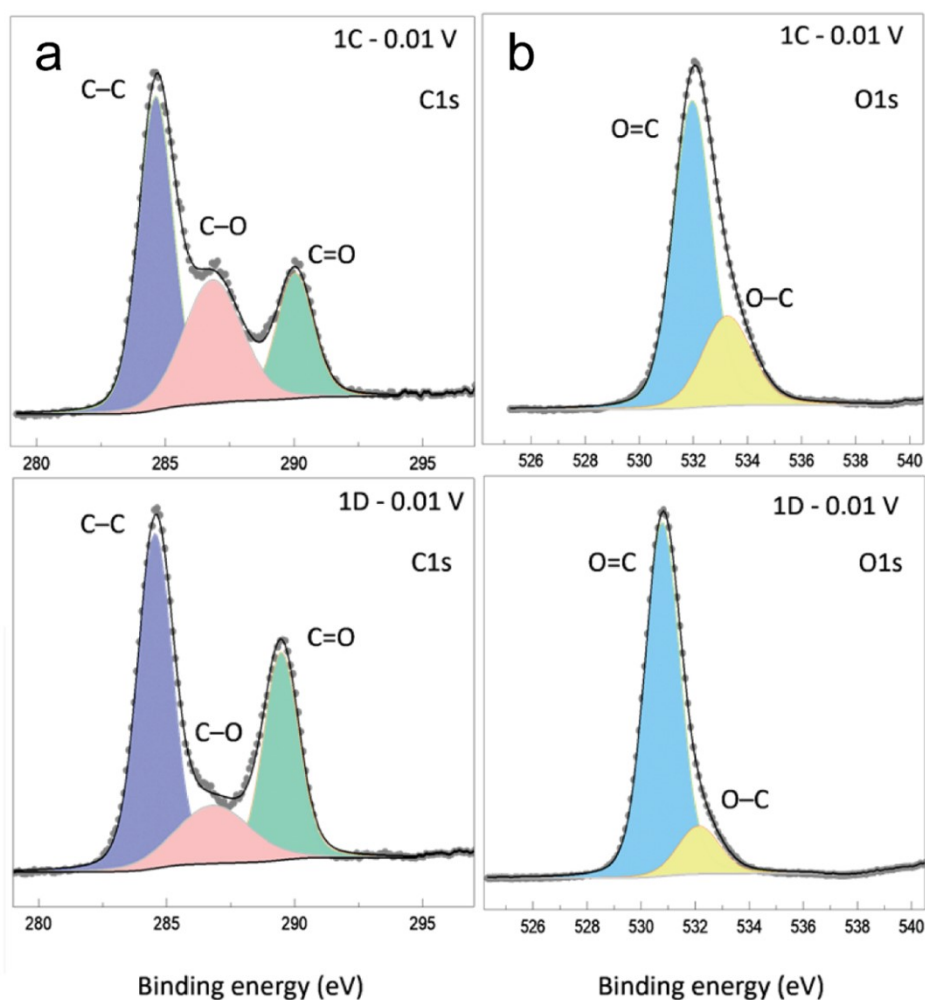

**Figure S3.** Ex-situ XPS study showing (a) C 1s spectra after full charge (top) and full discharge (bottom); and (b) O 1s spectra after full charge (top) and full discharge (bottom).
